# Supplementary material for: A hybrid hydrogel composed of chitin and β-glucan for the effective management of wound healing and scarring
Source: Royal Society of Chemistry journal article supplement (doi:10.1039/d2bm00935h), 2022-01-01
Supplement: d2bm00935h1.pdf [file d2bm00935h1.pdf]

## Supplementary information

### A hybrid hydrogel composed of chitin and $\beta$ -glucan for effectively management of wound healing and scarring

Ximeng Kang<sup>a, #</sup>, Jiaying Lei<sup>a, #</sup>, Chen Yang<sup>a</sup>, Peipei Zhang<sup>a</sup>, Xiaojiao Li<sup>b</sup>, Shaohua Zheng<sup>b</sup>, Qingqing Li<sup>a, \*</sup>, Jiye Zhang<sup>a, \*</sup>

#### Affiliations:

<sup>a</sup> School of Pharmacy, Health Science Center, Xi'an Jiaotong University, Xi'an, China

<sup>b</sup> The First Affiliated Hospital of Xi'an Jiaotong University, Xi'an, China

<sup>c</sup> Henan Xibaikang Health Industry Co., Ltd., Jiyuan, China

# Equal contribution

\* Co-corresponding authors

Qingqing Li, Ph.D.: Assistant Professor, School of Pharmacy, Health Science Center, Xi'an Jiaotong University, No. 76 Yanta Westroad, Xi'an, P. R. China. Email: [liqingqing0217@mail.xjtu.edu.cn](mailto:liqingqing0217@mail.xjtu.edu.cn)

Jiye Zhang, Ph.D.: Professor, School of Pharmacy, Health Science Center, Xi'an Jiaotong University, No. 76 Yanta Westroad, Xi'an, P. R. China. E-mail: [zjy2011@mail.xjtu.edu.cn](mailto:zjy2011@mail.xjtu.edu.cn)

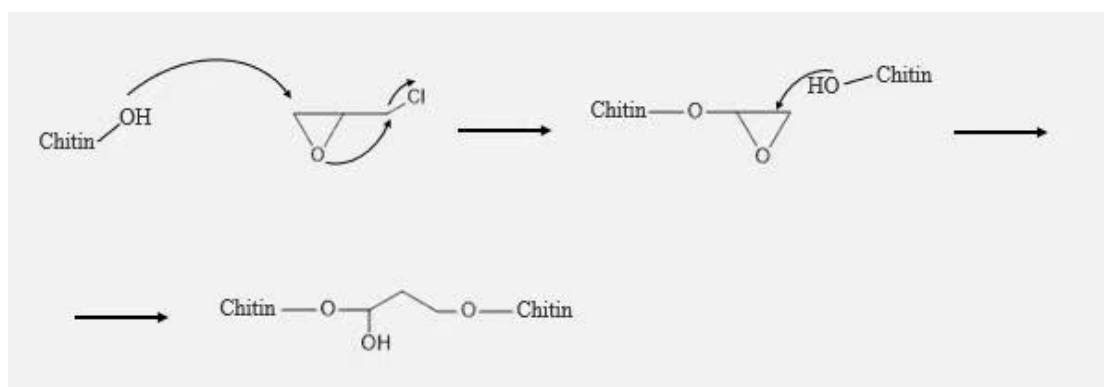

Figure S1. The reaction scheme between epichlorohydrin and chitin.

Table S1. Formulation optimization for Chitin hydrogel

| Concentration of Chitin (w/w) | ECH ( $\mu\text{L}$ ) | Gelation state |                                                                                       |
|-------------------------------|-----------------------|----------------|---------------------------------------------------------------------------------------|
| 1%                            | 20                    | No             | 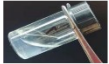   |
| 1%                            | 40                    | No             |    |
| 1%                            | 80                    | No             |   |
| 1.5%                          | 5                     | No             |  |
| 1.5%                          | 10                    | No             |  |
| 1.5%                          | 20                    | Yes            |  |
| 1.5%                          | 40                    | Yes            |  |
| 1.5%                          | 80                    | yes            |  |

Table S2. Formulation optimization for  $\beta$ -glucan hydrogel

| Concentration of $\beta$ -glucan (w/w) | ECH ( $\mu$ L) | Gelation state |                                                                                       |
|----------------------------------------|----------------|----------------|---------------------------------------------------------------------------------------|
| 1%                                     | 20             | no             | 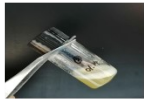   |
| 3%                                     | 20             | no             |    |
| 6%                                     | 5              | no             |   |
| 6%                                     | 10             | no             |  |
| 6%                                     | 20             | yes            |  |

Table S3. Formulation optimization for hybrid hydrogel

| The volume of 1.5% Chitin (mL) | The volume of 6% $\beta$ -glucan (mL) | ECH ( $\mu$ L) | Gelation state |                                                                                       |
|--------------------------------|---------------------------------------|----------------|----------------|---------------------------------------------------------------------------------------|
| 0.1                            | 0.9                                   | 20             | no             | 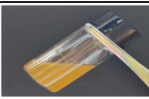   |
| 0.2                            | 0.8                                   | 20             | no             |    |
| 0.3                            | 0.7                                   | 20             | no             |    |
| 0.4                            | 0.6                                   | 20             | no             |   |
| 0.5                            | 0.5                                   | 20             | no             |  |
| 0.6                            | 0.4                                   | 20             | no             |  |
| 0.7                            | 0.3                                   | 20             | no             |  |
| 0.8                            | 0.2                                   | 20             | yes            |  |
| 0.9                            | 0.1                                   | 20             | yes            |  |

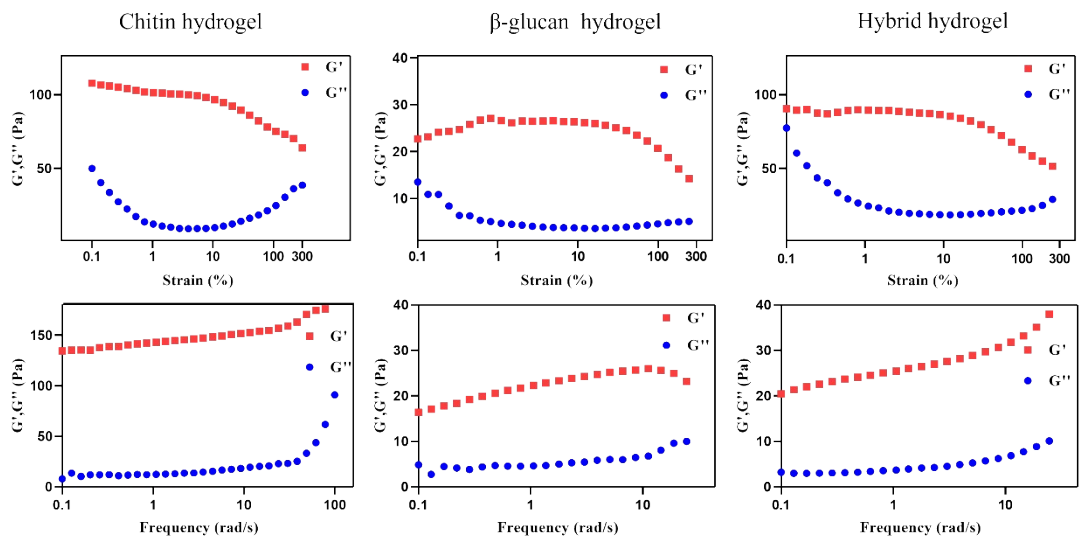

Figure S2. Rheological properties of the three hydrogels.

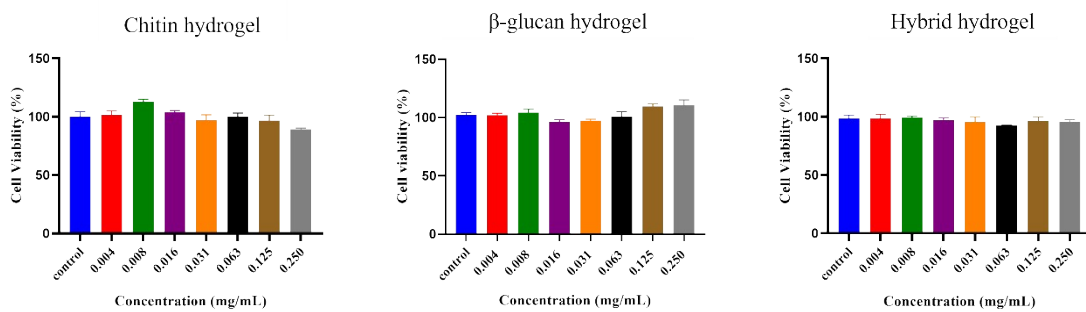

Figure S3. Cytotoxicity of the three hydrogels.
